# Supplementary material for: Association between Menopausal Hormone Therapy and Frailty: Cross-Sectional Study Using National Survey Data in Korea
Source: MDPI journal article supplement (doi:10.3390/healthcare10112121), 2022-10-24
Supplement: s1 [file s1]

## S1. The 51-item frailty index

| No. | Category                   | Item                                                                                                   | Scoring                                                                                                                                                                                                                                                          |
|-----|----------------------------|--------------------------------------------------------------------------------------------------------|------------------------------------------------------------------------------------------------------------------------------------------------------------------------------------------------------------------------------------------------------------------|
| 1   | Self-reported              | Ever diagnosed with stroke                                                                             | 0= No; 1=Yes                                                                                                                                                                                                                                                     |
| 2   |                            | Ever diagnosed with MI                                                                                 |                                                                                                                                                                                                                                                                  |
| 3   |                            | Ever diagnosed with angina pectoris                                                                    |                                                                                                                                                                                                                                                                  |
| 4   |                            | Currently treating depression                                                                          |                                                                                                                                                                                                                                                                  |
| 5   |                            | Ever diagnosed with thyroid illness                                                                    |                                                                                                                                                                                                                                                                  |
| 6   |                            | Currently treating asthma                                                                              |                                                                                                                                                                                                                                                                  |
| 7   |                            | Ever diagnosed with RA                                                                                 |                                                                                                                                                                                                                                                                  |
| 8   |                            | Ever diagnosed with OA<br><i>*Clinical examination data were used if available.</i>                    |                                                                                                                                                                                                                                                                  |
| 9   |                            | KNHANES VI: Current lumbago; KNHANES V: Recent lumbago continuous for 3 months                         |                                                                                                                                                                                                                                                                  |
| 10  |                            | Diagnosed with any cancer excluding skin cancer within 5 years                                         |                                                                                                                                                                                                                                                                  |
| 11  |                            | Any current restrictions in daily living/social activities due to illness, physical or mental disorder |                                                                                                                                                                                                                                                                  |
| 12  |                            | Any bed stays almost all-day last month                                                                |                                                                                                                                                                                                                                                                  |
| 13  |                            | Self-reported health                                                                                   | 0=Very good-good; 0.5=common; 1=Bad-very bad                                                                                                                                                                                                                     |
| 14  |                            | (EQ5D) Difficulty walking                                                                              | 0= No; 0.5=A little; 1=Severe                                                                                                                                                                                                                                    |
| 15  |                            | (EQ5D) Difficulty self-management                                                                      |                                                                                                                                                                                                                                                                  |
| 16  |                            | (EQ5D) Difficulty ADL                                                                                  |                                                                                                                                                                                                                                                                  |
| 17  |                            | (EQ5D) Pain                                                                                            |                                                                                                                                                                                                                                                                  |
| 18  |                            | (EQ5D) Depressive                                                                                      |                                                                                                                                                                                                                                                                  |
| 19  |                            | Low physical activity within 1 week (low 20%; adjusted by age, sex)                                    | 0= Not low; 1=Low                                                                                                                                                                                                                                                |
| 20  | Body measurement           | Low weight                                                                                             | 0=Not low; 1=Low (BMI <18.5 kg/m <sup>2</sup> )                                                                                                                                                                                                                  |
| 21  |                            | Obese                                                                                                  | 0=Not obese (<23); 0.5=Slightly obese (≥25 and <30); 0.25=Borderline obese (≥23 and <25); 0.75=Obese (≥30 and <35); 1=Most obese (BMI ≥35 kg/m <sup>2</sup> )                                                                                                    |
| 22  | Blood pressure measurement | Hypertension                                                                                           | 0=No; 1=Yes (SBP≥140 mmHg or DBP≥90 or taking anti-hypertensive)<br><i>*If measurements were not available, survey data were used, i.e., ever diagnosed</i>                                                                                                      |
| 23  |                            | Hypotension                                                                                            | 0=No; 1=Yes (SBP<90 mmHg or DBP<60)                                                                                                                                                                                                                              |
| 24  |                            | Irregular heart rate                                                                                   | 0=No; 1=Yes                                                                                                                                                                                                                                                      |
| 25  | Blood test                 | Hypercholesteremia                                                                                     | 0=No; 1= Yes (≥240 mg/dL after fasting 8 or more hours, or taking lipid control medications)                                                                                                                                                                     |
| 26  |                            | High-density lipoprotein (HDL)                                                                         | 0=No; 1=Low (<40 mg/dL after fasting 8 or more hours)                                                                                                                                                                                                            |
| 27  |                            | Triglyceride                                                                                           | 0=No; 1=High (≥200 mg/dL after fasting 12 or more hours)                                                                                                                                                                                                         |
| 28  |                            | Diabetes                                                                                               | 0=No; 1=Yes (Glucose ≥126 mg/dL after fasting 8 or more hours, or diagnosed with diabetes by a doctor or taking glucose-lowering medication or administering insulin)<br><i>*If measurements were not available, survey data were used, i.e., ever diagnosed</i> |
| 29  |                            | Hemoglobin A1c                                                                                         | 0=Not high (≤5.6%); 0.5=Borderline (>5.6% and <6.5%); 1=Uncontrolled (≥6.5%)                                                                                                                                                                                     |

|    |                         |                                                                                            |                                                                                                                                                                                        |
|----|-------------------------|--------------------------------------------------------------------------------------------|----------------------------------------------------------------------------------------------------------------------------------------------------------------------------------------|
|    |                         |                                                                                            | <i>*2007~2010: Measured only in patients currently under diabetes treatment/fasting glucose <math>\geq 126</math>mg/d; 2011~2012: All participants age <math>\geq 10</math> years)</i> |
| 30 |                         | ALT                                                                                        | 0: $\leq$ ULN; 0.5: $>$ ULN, $\leq 2\times$ ULN; 1: $> 2\times$ ULN (ULN, male: $>33$ IU/L, female: $>25$ IU/L)                                                                        |
| 31 |                         | AST                                                                                        | 0: $<$ ULN; 0.5: $\geq$ ULN, $<2\times$ ULN; 1: $\geq 2\times$ ULN (ULN, 20 IU/L)                                                                                                      |
| 32 |                         | Anemia                                                                                     | 0=No; 1=Yes (M: Hemoglobin $<13$ g/dL, F: $<12$ g/dL)                                                                                                                                  |
| 33 |                         | Hematocrit                                                                                 | 0=Not low; 1=Low ( $\leq 24\%$ )                                                                                                                                                       |
| 34 |                         | Renal failure                                                                              | 0=Not low; 1=Low (Cockcroft-Gault CrCl $<60$ mL/min)<br><i>*If measurements were not available, survey data were used, i.e., currently have~</i>                                       |
| 35 |                         | White blood cell count                                                                     | 0=4~10 thous/uL (inclusive); else 1                                                                                                                                                    |
| 36 |                         | Red blood cell count                                                                       | 0=M: 4.2~6.3 million cells/uL, F: 4.0~5.4 (inclusive); else 1                                                                                                                          |
| 37 |                         | Platelet                                                                                   | 0=150~450 thous/uL (inclusive); else 1                                                                                                                                                 |
| 38 | Chest x-ray examination | Heart disease, i.e., right cardiomyopathy, hypertrophy, congenital/ acquired heart disease | 0= No; 1=Yes                                                                                                                                                                           |
| 39 |                         | Active pulmonary disease except for TB                                                     |                                                                                                                                                                                        |
| 40 |                         | Others, i.e., pulmonary nodule, lung cancer, mediastinal disease                           |                                                                                                                                                                                        |
| 41 |                         | (Survey) Cough                                                                             |                                                                                                                                                                                        |
| 42 |                         | (Survey) Phlegm                                                                            |                                                                                                                                                                                        |
| 43 |                         | (Survey) Chest pain                                                                        |                                                                                                                                                                                        |
| 44 |                         | (Survey) Difficulty in breathing                                                           |                                                                                                                                                                                        |
| 45 |                         | (Survey) Weight loss                                                                       |                                                                                                                                                                                        |
| 46 |                         | (Survey) Exhaustion                                                                        |                                                                                                                                                                                        |
| 47 | Other examination       | (Survey) Poor oral health                                                                  | 0= Very good-good; 0.5=Common; 1=Bad-very bad                                                                                                                                          |
| 48 |                         | (Survey) Problems with chewing                                                             | 0= Not at all/Not really/Okay; 0.5= Uncomfortable; 1=Very uncomfortable                                                                                                                |
| 49 |                         | (Survey) Problems with talking                                                             |                                                                                                                                                                                        |
| 50 |                         | (Survey) Problems with hearing                                                             | 0=No; 1=Yes                                                                                                                                                                            |
| 51 |                         | Poor vision                                                                                | 0=No; 1=Yes                                                                                                                                                                            |

## S2. Balance diagnostics of variables included in the propensity score model

| Characteristics (reference)                            | Before IPTW |                | After IPTW |                |
|--------------------------------------------------------|-------------|----------------|------------|----------------|
|                                                        | SMD         | Variance ratio | SMD        | Variance ratio |
| Middle school, graduated (did not graduate)            | -0.48       | 1.10           | -0.04      | 1.02           |
| Household income, low <sup>a</sup> (not low)           | 0.41        | 0.69           | 0.04       | 0.98           |
| National insurance, others <sup>b</sup> (self/company) | 0.18        | 0.43           | 0.02       | 0.93           |
| Age at menopause                                       | 0.02        | 0.87           | 0.05       | 0.87           |
| Number of pregnancies                                  | -0.16       | 0.96           | -0.02      | 1.18           |
| Use of oral contraceptives, yes (never)                | -0.28       | 1.37           | -0.01      | 1.02           |
| Comorbidities at baseline <sup>c</sup>                 |             |                |            |                |
| Hypertension                                           | -0.14       | 1.48           | -0.03      | 1.11           |
| Dyslipidemia                                           | -0.09       | 1.61           | -0.01      | 1.03           |
| MI/AP                                                  | -0.01       | 1.13           | 0.00       | 0.97           |
| Stroke                                                 | -0.02       | 1.26           | 0.00       | 0.99           |
| Diabetes                                               | -0.02       | 1.11           | 0.00       | 1.00           |
| Hepatitis B, C, or cirrhosis                           | -0.01       | 1.12           | -0.06      | 1.54           |
| Any cancer excluding skin cancer                       | -0.08       | 1.77           | -0.02      | 1.19           |
| Renal failure                                          | -0.01       | 1.12           | -0.05      | 1.84           |
| Depression                                             | -0.12       | 1.18           | -0.04      | 1.06           |
| Thyroid illness                                        | -0.08       | 1.53           | -0.01      | 1.05           |
| Asthma                                                 | -0.01       | 1.03           | 0.00       | 0.98           |
| Arthritis                                              | -0.05       | 1.11           | 0.00       | 0.99           |

IPTW, inverse probability of treatment weighting. SMD, standardized mean difference.

- a Equivalized household income, i.e., household income/ $\sqrt{\text{number of household members}}$  in the lowest 25%; quartiles stratified by sex and age group.
- b Medical Aid Class 1 or 2, no health insurance, or unknown.
- c Ever diagnosed before menopause (controls) or MHT (treatment group): hypertension, dyslipidemia, myocardial infarction (MI), angina pectoris (AP), stroke, diabetes, liver disease (hepatitis B or C, cirrhosis), cancer excluding skin cancer, renal failure, depression, thyroid illness (both hyper- and hypothyroidism), asthma, or arthritis (rheumatoid arthritis and osteoarthritis).

### S3. Comparison of the number of comorbidities stratified by age at baseline

| Age at baseline | Number of comorbidities at baseline <sup>a</sup> | Control<br>( <i>n</i> =6,779) |           |              | Treated<br>( <i>n</i> =1,044) |           |              | <i>p</i> |
|-----------------|--------------------------------------------------|-------------------------------|-----------|--------------|-------------------------------|-----------|--------------|----------|
|                 |                                                  | <i>n</i>                      | <i>n'</i> | % (SE)       | <i>n</i>                      | <i>n'</i> | % (SE)       |          |
| <50             | 0                                                | 2200                          | 1484      | 64.12 (0.99) | 190                           | 117       | 52.56 (3.19) | <0.001   |
|                 | 1                                                | 927                           | 609       | 27.65 (0.93) | 119                           | 79        | 33.40 (2.97) |          |
|                 | ≥2                                               | 262                           | 163       | 8.23 (0.60)  | 47                            | 31        | 14.03 (2.22) |          |
| 50-55           | 0                                                | 1551                          | 944       | 55.45 (1.18) | 209                           | 144       | 45.49 (2.81) |          |
|                 | 1                                                | 844                           | 622       | 30.84 (1.04) | 152                           | 107       | 34.44 (2.67) |          |
|                 | ≥2                                               | 352                           | 230       | 13.71 (0.82) | 82                            | 48        | 20.07 (2.42) |          |
| 55-60           | 0                                                | 309                           | 228       | 51.00 (2.42) | 67                            | 57        | 37.88 (4.60) |          |
|                 | 1                                                | 179                           | 144       | 30.06 (2.09) | 68                            | 56        | 38.51 (4.40) |          |
|                 | ≥2                                               | 119                           | 88        | 18.94 (1.90) | 36                            | 28        | 23.61 (3.96) |          |
| ≥60             | 0                                                | 18                            | 12        | 49.26 (9.40) | 25                            | 19        | 31.93 (6.59) |          |
|                 | 1                                                | 8                             | 6         | 21.99 (7.63) | 25                            | 23        | 35.92 (6.59) |          |
|                 | ≥2                                               | 10                            | 7         | 28.74 (9.21) | 24                            | 23        | 32.16 (6.24) |          |

Inverse probability of treatment weighting was not applied. *n*, unweighted frequency; *n'*, effective sample size (= *n*/design effect); %, weighted percentage; SE, standard error.

- a Ever diagnosed before menopause (controls) or MHT (treatment group): hypertension, dyslipidemia, myocardial infarction (MI), angina pectoris (AP), stroke, diabetes, liver disease (hepatitis B or C, cirrhosis), cancer excluding skin cancer, renal failure, depression, thyroid illness (both hyper- and hypothyroidism), asthma, or arthritis (rheumatoid arthritis and osteoarthritis).

#### S4. Comparison of characteristics between treatment groups before and after IPTW

| Characteristics                         | Before IPTW          |      |              |                      |     |              |       | After IPTW           |      |              |                      |     |              |       |
|-----------------------------------------|----------------------|------|--------------|----------------------|-----|--------------|-------|----------------------|------|--------------|----------------------|-----|--------------|-------|
|                                         | Control<br>(n=6,779) |      |              | Treated<br>(n=1,044) |     |              | p     | Control<br>(n=6,779) |      |              | Treated<br>(n=1,044) |     |              | p     |
|                                         | n                    | n'   | % (SE)       | n                    | n'  | % (SE)       |       | n                    | n'   | % (SE)       | n                    | n'  | % (SE)       |       |
| Frailty index*                          | 0.15 (0.001)         |      |              | 0.13 (0.003)         |     |              | <.001 | 0.15 (0.001)         |      |              | 0.14 (0.003)         |     |              | <.001 |
| Age at survey*                          | 63.13 (0.17)         |      |              | 58.45 (0.25)         |     |              | <.001 | 62.66 (0.17)         |      |              | 59.50 (0.32)         |     |              | <.001 |
| Survey year, 2008-2009                  | 2555                 | 1302 | 34.90 (0.83) | 291                  | 166 | 30.05 (1.89) | 0.016 | 2555                 | 1475 | 34.72 (0.82) | 291                  | 42  | 29.47 (2.11) | 0.020 |
| 2010-2012                               | 4224                 | 1981 | 65.10 (0.83) | 753                  | 464 | 69.95 (1.89) |       | 4224                 | 1406 | 65.28 (0.82) | 753                  | 124 | 70.53 (2.11) |       |
| Education, <Middle school               | 4503                 | 2056 | 62.46 (0.90) | 446                  | 278 | 41.74 (1.93) | <.001 | 4503                 | 1782 | 59.01 (0.92) | 446                  | 60  | 58.57 (2.10) | 0.844 |
| ≥Middle school                          | 2276                 | 997  | 37.54 (0.90) | 598                  | 374 | 58.26 (1.93) |       | 2276                 | 960  | 40.99 (0.92) | 598                  | 135 | 41.43 (2.10) |       |
| Household income, Not low               | 4129                 | 2159 | 65.31 (0.83) | 826                  | 529 | 80.58 (1.45) | <.001 | 4129                 | 1435 | 67.86 (0.79) | 826                  | 153 | 68.26 (2.36) | 0.870 |
| Low <sup>a</sup>                        | 2650                 | 1294 | 34.69 (0.83) | 218                  | 153 | 19.42 (1.45) |       | 2650                 | 1462 | 32.14 (0.79) | 218                  | 23  | 31.74 (2.36) |       |
| Living area, MSA <sup>b</sup>           | 2705                 | 836  | 43.56 (1.12) | 546                  | 355 | 52.80 (2.07) | <.001 | 2705                 | 990  | 44.02 (1.10) | 546                  | 83  | 52.78 (2.36) | <.001 |
| Other                                   | 4074                 | 1267 | 56.44 (1.12) | 498                  | 266 | 47.20 (2.07) |       | 4074                 | 1344 | 55.98 (1.10) | 498                  | 71  | 47.22 (2.36) |       |
| Married and living together, Yes        | 4322                 | 2416 | 64.99 (0.77) | 823                  | 514 | 78.22 (1.59) | <.001 | 4322                 | 1510 | 66.40 (0.76) | 823                  | 150 | 75.13 (1.98) | <.001 |
| No <sup>c</sup>                         | 2450                 | 1405 | 35.01 (0.77) | 220                  | 143 | 21.78 (1.59) |       | 2450                 | 1478 | 33.60 (0.76) | 220                  | 31  | 24.87 (1.98) |       |
| Insurance, Self/company                 | 6345                 | 4027 | 94.29 (0.37) | 1016                 | 633 | 97.26 (0.60) | 0.001 | 6345                 | 1533 | 94.79 (0.34) | 1016                 | 209 | 94.92 (1.16) | 0.911 |
| Others <sup>d</sup>                     | 434                  | 256  | 5.71 (0.37)  | 28                   | 20  | 2.74 (0.60)  |       | 434                  | 403  | 5.21 (0.34)  | 28                   | 3   | 5.08 (1.16)  |       |
| Smoking history, Never                  | 6206                 | 3668 | 90.57 (0.48) | 975                  | 617 | 92.08 (1.06) | 0.220 | 6206                 | 1585 | 90.72 (0.48) | 975                  | 195 | 91.58 (1.29) | 0.541 |
| At least once                           | 567                  | 309  | 9.43 (0.48)  | 69                   | 42  | 7.92 (1.06)  |       | 567                  | 436  | 9.28 (0.48)  | 69                   | 9   | 8.42 (1.29)  |       |
| Number of pregnancies*                  | 4.82 (0.04)          |      |              | 4.42 (0.08)          |     |              | <.001 | 4.76 (0.04)          |      |              | 4.70 (0.12)          |     |              | 0.589 |
| Birth experience, 0                     | 141                  | 101  | 2.08 (0.21)  | 24                   | 16  | 2.13 (0.55)  | 0.009 | 141                  | 157  | 2.09 (0.21)  | 24                   | 4   | 1.99 (0.55)  | 0.850 |
| ≥1                                      | 6610                 | 3882 | 97.92 (0.21) | 1016                 | 632 | 97.87 (0.55) |       | 6610                 | 1470 | 97.91 (0.21) | 1016                 | 222 | 98.01 (0.55) |       |
| Months of OC use*                       | 4.22 (0.25)          |      |              | 6.75 (0.65)          |     |              | <.001 | 4.58 (0.27)          |      |              | 5.13 (0.56)          |     |              | 0.384 |
| Age at menarche*                        | 15.99 (0.04)         |      |              | 15.70 (0.07)         |     |              | <.001 | 15.94 (0.04)         |      |              | 15.86 (0.09)         |     |              | 0.383 |
| Age at menopause*                       | 48.69 (0.08)         |      |              | 48.43 (0.17)         |     |              | 0.153 | 48.71 (0.08)         |      |              | 48.57 (0.19)         |     |              | 0.518 |
| Baseline comorbidities <sup>e</sup> , 0 | 4078                 | 2826 | 59.38 (0.73) | 491                  | 340 | 46.29 (1.87) | <.001 | 4078                 | 1905 | 58.13 (0.73) | 491                  | 81  | 49.85 (2.19) | <.001 |
| 1                                       | 1958                 | 1400 | 29.13 (0.65) | 364                  | 258 | 34.68 (1.72) |       | 1958                 | 1316 | 29.56 (0.66) | 364                  | 58  | 35.29 (2.04) |       |
| ≥2                                      | 743                  | 443  | 11.49 (0.49) | 189                  | 121 | 19.02 (1.46) |       | 743                  | 517  | 12.32 (0.53) | 189                  | 39  | 14.86 (1.33) |       |
| Hypertension, No                        | 6281                 | 3856 | 92.09 (0.42) | 910                  | 596 | 86.68 (1.26) | <.001 | 6281                 | 1615 | 91.42 (0.46) | 910                  | 195 | 89.14 (1.28) | 0.067 |
| Yes                                     | 498                  | 298  | 7.91 (0.42)  | 134                  | 89  | 13.32 (1.26) |       | 498                  | 374  | 8.58 (0.46)  | 134                  | 22  | 10.86 (1.28) |       |
| Dyslipidemia, No                        | 6598                 | 4034 | 97.12 (0.26) | 992                  | 625 | 95.59 (0.72) | 0.023 | 6598                 | 1523 | 96.86 (0.28) | 992                  | 217 | 96.79 (0.64) | 0.921 |
| Yes                                     | 181                  | 112  | 2.88 (0.26)  | 52                   | 41  | 4.41 (0.72)  |       | 181                  | 159  | 3.14 (0.28)  | 52                   | 11  | 3.21 (0.64)  |       |
| MI, No                                  | 9432                 | 7541 | 99.97 (0.02) | 479                  | 381 | 100.0 (0.00) | 0.806 | 6760                 | 1493 | 99.69 (0.09) | 1042                 | 227 | 99.78 (0.17) | 0.675 |
| Yes                                     | 3                    | 3    | 0.03 (0.02)  | 0                    | 0   | .            |       | 19                   | 17   | 0.31 (0.09)  | 2                    | 0   | 0.22 (0.17)  |       |
| AP, No                                  | 6718                 | 4261 | 99.00 (0.14) | 1031                 | 647 | 98.75 (0.43) | 0.562 | 6718                 | 1508 | 99.00 (0.15) | 1031                 | 224 | 98.86 (0.44) | 0.756 |
| Yes                                     | 61                   | 43   | 1.00 (0.14)  | 13                   | 8   | 1.25 (0.43)  |       | 61                   | 64   | 1.00 (0.15)  | 13                   | 2   | 1.14 (0.44)  |       |
| Stroke, No                              | 6730                 | 4241 | 99.35 (0.11) | 1033                 | 638 | 99.16 (0.31) | 0.534 | 6730                 | 1498 | 99.31 (0.12) | 1033                 | 223 | 99.33 (0.27) | 0.968 |
| Yes                                     | 49                   | 38   | 0.65 (0.11)  | 11                   | 9   | 0.84 (0.31)  |       | 49                   | 54   | 0.69 (0.12)  | 11                   | 3   | 0.67 (0.27)  |       |
| Diabetes, No                            | 6598                 | 3980 | 97.07 (0.28) | 1009                 | 627 | 96.81 (0.64) | 0.704 | 6598                 | 1511 | 97.04 (0.28) | 1009                 | 215 | 97.37 (0.53) | 0.590 |

|                        |      |      |              |      |     |              |       |      |      |              |      |     |              |       |
|------------------------|------|------|--------------|------|-----|--------------|-------|------|------|--------------|------|-----|--------------|-------|
| Yes                    | 181  | 100  | 2.93 (0.28)  | 35   | 26  | 3.19 (0.64)  |       | 181  | 151  | 2.96 (0.28)  | 35   | 9   | 2.63 (0.53)  |       |
| Hep B/C, cirrhosis, No | 6704 | 4225 | 98.86 (0.16) | 1029 | 637 | 98.43 (0.46) | 0.329 | 6704 | 1504 | 98.82 (1.16) | 1029 | 220 | 97.72 (0.76) | 0.065 |
| Yes                    | 75   | 52   | 1.14 (0.16)  | 15   | 11  | 1.57 (0.46)  |       | 75   | 77   | 1.18 (1.16)  | 15   | 2   | 2.28 (0.76)  |       |
| Cancer, No             | 6682 | 4314 | 98.37 (0.20) | 1013 | 622 | 97.51 (0.53) | 0.081 | 6682 | 1530 | 98.17 (0.22) | 1013 | 217 | 97.92 (0.52) | 0.652 |
| Yes                    | 97   | 58   | 1.63 (0.20)  | 31   | 26  | 2.49 (0.53)  |       | 97   | 80   | 1.83 (0.22)  | 31   | 7   | 2.08 (0.52)  |       |
| Renal failure, No      | 6759 | 4203 | 99.72 (0.08) | 1040 | 647 | 99.67 (0.17) | 0.774 | 6759 | 1490 | 99.71 (0.08) | 1040 | 229 | 99.45 (0.36) | 0.353 |
| Yes                    | 20   | 15   | 0.28 (0.08)  | 4    | 5   | 0.33 (0.17)  |       | 20   | 22   | 0.29 (0.08)  | 4    | 0   | 0.55 (0.36)  |       |
| Depression, No         | 5542 | 3642 | 82.25 (0.57) | 779  | 508 | 72.95 (1.75) | <.001 | 5542 | 1700 | 81.50 (0.60) | 779  | 137 | 75.62 (1.88) | 0.001 |
| Yes                    | 1237 | 798  | 17.75 (0.57) | 265  | 158 | 27.05 (1.75) |       | 1237 | 871  | 18.50 (0.60) | 265  | 42  | 24.38 (1.88) |       |
| Thyroid illness, No    | 6598 | 4365 | 96.92 (0.28) | 995  | 636 | 95.01 (0.82) | 0.011 | 6598 | 1567 | 96.70 (0.30) | 995  | 219 | 95.78 (0.98) | 0.330 |
| Yes                    | 181  | 99   | 3.08 (0.28)  | 49   | 33  | 4.99 (0.82)  |       | 181  | 142  | 3.30 (0.30)  | 49   | 6   | 4.22 (0.98)  |       |
| Asthma, No             | 6584 | 4113 | 97.01 (0.28) | 1008 | 645 | 96.05 (0.76) | 0.203 | 6584 | 1525 | 97.01 (0.28) | 1008 | 218 | 96.37 (0.78) | 0.413 |
| Yes                    | 195  | 104  | 2.99 (0.28)  | 36   | 22  | 3.95 (0.76)  |       | 195  | 161  | 2.99 (0.28)  | 36   | 6   | 3.63 (0.78)  |       |
| Arthritis, No          | 5869 | 4005 | 86.26 (0.53) | 868  | 575 | 83.00 (1.40) | 0.017 | 5869 | 1678 | 85.95 (0.54) | 868  | 168 | 84.71 (1.47) | 0.406 |
| Yes                    | 910  | 557  | 13.74 (0.53) | 176  | 115 | 17.00 (1.40) |       | 910  | 674  | 14.05 (0.54) | 176  | 31  | 15.29 (1.47) |       |

Inverse probability of treatment weighting (IPTW) was not applied. \* mean (SE).

*n*, unweighted frequency; *n'*, effective sample size (= *n*/design effect); %, weighted percentage; SE, standard error; OC, oral contraceptives.

- a Equivalized household income, i.e., household income/ $\sqrt{\text{\# of household members}}$  in the lowest 25%; quartiles stratified by sex and age group.
- b Metropolitan statistical areas, i.e., top eight major cities in the Republic of Korea.
- c Never married, separated, widowed, or divorced.
- d Medical Aid Class 1 or 2, no health insurance, or unknown.
- e Ever diagnosed before menopause (controls) or MHT (treatment group): hypertension, dyslipidemia, myocardial infarction (MI), angina pectoris (AP), stroke, diabetes, liver disease (hepatitis B or C, cirrhosis), cancer excluding skin cancer, renal failure, depression, thyroid illness (both hyper- and hypothyroidism), asthma, or arthritis (rheumatoid arthritis and osteoarthritis).

# S5. Characteristics associated with frailty (IPTW regression analysis, Model 3)

| Characteristics                                    | Exposure:<br>Duration of MHT |          | Exposure:<br>Age at first MHT |          | Exposure:<br>Time to MHT initiation |          |
|----------------------------------------------------|------------------------------|----------|-------------------------------|----------|-------------------------------------|----------|
|                                                    | B (SE)                       | <i>p</i> | B (SE)                        | <i>p</i> | B (SE)                              | <i>p</i> |
| Age at survey                                      | 0.003 (0.000)                | <.001    | 0.003 (0.000)                 | <.001    | 0.003 (0.000)                       | <.001    |
| Survey year, V (IV)                                | -0.011 (0.003)               | 0.001    | -0.010 (0.003)                | 0.001    | -0.011 (0.003)                      | <.001    |
| Education, ≥Middle school (<Middle school)         | -0.015 (0.003)               | <.001    | -0.015 (0.003)                | <.001    | -0.015 (0.003)                      | <.001    |
| Household income, Low <sup>a</sup> (Not low)       | 0.011 (0.004)                | 0.002    | 0.012 (0.003)                 | 0.001    | 0.011 (0.004)                       | 0.002    |
| Living area, Other (MSA <sup>b</sup> )             | 0.009 (0.003)                | 0.001    | 0.008 (0.003)                 | 0.003    | 0.009 (0.003)                       | 0.003    |
| Married and living together, No <sup>c</sup> (Yes) | 0.005 (0.003)                | 0.124    | 0.005 (0.003)                 | 0.106    | 0.005 (0.003)                       | 0.097    |
| Insurance, Others <sup>d</sup> (Self/company)      | 0.028 (0.007)                | <.001    | 0.028 (0.007)                 | <.001    | 0.029 (0.007)                       | <.001    |
| Smoking history, At least once (Never)             | 0.006 (0.005)                | 0.218    | 0.005 (0.005)                 | 0.271    | 0.005 (0.005)                       | 0.289    |
| Number of pregnancies                              | 0.002 (0.001)                | <.001    | 0.002 (0.001)                 | <.001    | 0.002 (0.001)                       | 0.001    |
| Age at menarche                                    | -0.001 (0.001)               | 0.169    | -0.001 (0.001)                | 0.166    | -0.001 (0.001)                      | 0.194    |
| Age at menopause                                   | -0.002 (0.000)               | <.001    | -0.001 (0.000)                | <.001    | -0.002 (0.000)                      | <.001    |
| Baseline comorbidities <sup>e</sup> , 1 (0)        | 0.023 (0.003)                | <.001    | 0.022 (0.003)                 | <.001    | 0.023 (0.003)                       | <.001    |
| ≥2 (0)                                             | 0.065 (0.005)                | <.001    | 0.065 (0.005)                 | <.001    | 0.066 (0.004)                       | <.001    |
| Baseline depression, Yes (No)                      | -0.005 (0.004)               | 0.164    | -0.005 (0.004)                | 0.178    | -0.006 (0.004)                      | 0.136    |

Inverse probability of treatment weighting (IPTW) was applied. SE, standard error.

- a Equivalized household income, i.e., household income/√(number of household members) in the lowest 25%; quartiles stratified by sex and age group.
- b Metropolitan statistical areas, i.e., top eight major cities in the Republic of Korea.
- c Never married, separated, widowed, or divorced.
- d Medical Aid Class 1 or 2, no health insurance, or unknown.
- e Ever diagnosed before menopause (controls) or MHT (treatment group): hypertension, dyslipidemia, myocardial infarction (MI), angina pectoris (AP), stroke, diabetes, liver disease (hepatitis B or C, cirrhosis), cancer excluding skin cancer, renal failure, depression, thyroid illness (both hyper- and hypothyroidism), asthma, or arthritis (rheumatoid arthritis and osteoarthritis).

## S6. Characteristics of the subgroups in KNHANES

| Characteristics                                      | Years since menopause [1, 30]<br>( <i>n</i> = 6,634) |            |              | Age at menopause > 45<br>( <i>n</i> = 6,111) |            |              | No hysterectomy <sup>a</sup><br>( <i>n</i> = 2,653) |            |              | No bilateral oophorectomy <sup>b</sup><br>( <i>n</i> = 4,746) |            |              |
|------------------------------------------------------|------------------------------------------------------|------------|--------------|----------------------------------------------|------------|--------------|-----------------------------------------------------|------------|--------------|---------------------------------------------------------------|------------|--------------|
|                                                      | <i>n</i>                                             | <i>n</i> ' | % (SE)       | <i>n</i>                                     | <i>n</i> ' | % (SE)       | <i>n</i>                                            | <i>n</i> ' | % (SE)       | <i>n</i>                                                      | <i>n</i> ' | % (SE)       |
| Age at survey (years)                                |                                                      |            |              |                                              |            |              |                                                     |            |              |                                                               |            |              |
| Mean (SE)                                            | 61.30 (0.14)                                         |            |              | 62.17 (0.15)                                 |            |              | 62.94 (0.26)                                        |            |              | 62.64 (0.20)                                                  |            |              |
| Min-Max                                              | 32-80                                                |            |              | 46-80                                        |            |              | 35-80                                               |            |              | 34-80                                                         |            |              |
| Age at menopause (years)                             |                                                      |            |              |                                              |            |              |                                                     |            |              |                                                               |            |              |
| Mean (SE)                                            | 49.33 (0.07)                                         |            |              | 50.73 (0.05)                                 |            |              | 49.00 (0.10)                                        |            |              | 48.88 (0.09)                                                  |            |              |
| Min-Max                                              | 30-62                                                |            |              | 46-62                                        |            |              | 30-62                                               |            |              | 30-62                                                         |            |              |
| Time since menopause (years)                         |                                                      |            |              |                                              |            |              |                                                     |            |              |                                                               |            |              |
| <10                                                  | 2594                                                 | 1475       | 46.41 (0.81) | 2602                                         | 1494       | 50.11 (0.83) | 918                                                 | 470        | 42.81 (1.34) | 1794                                                          | 929        | 44.51 (1.00) |
| 10-19                                                | 2253                                                 | 1502       | 30.82 (0.69) | 1925                                         | 1369       | 27.65 (0.68) | 768                                                 | 563        | 26.85 (1.02) | 1341                                                          | 889        | 25.28 (0.78) |
| 20-29                                                | 1787                                                 | 1271       | 22.78 (0.61) | 1301                                         | 973        | 18.29 (0.58) | 639                                                 | 485        | 19.77 (0.88) | 1051                                                          | 777        | 19.33 (0.67) |
| ≥30                                                  | -                                                    | -          | -            | 260                                          | 198        | 3.95 (0.29)  | 327                                                 | 256        | 10.57 (0.67) | 538                                                           | 351        | 10.88 (0.56) |
| Frailty index (FI)                                   |                                                      |            |              |                                              |            |              |                                                     |            |              |                                                               |            |              |
| Mean (SE)                                            | 0.14 (0.00)                                          |            |              | 0.15 (0.00)                                  |            |              | 0.16 (0.00)                                         |            |              | 0.15 (0.00)                                                   |            |              |
| Min-Max                                              | 0-0.52                                               |            |              | 0-0.52                                       |            |              | 0-0.52                                              |            |              | 0-0.49                                                        |            |              |
| MHT                                                  |                                                      |            |              |                                              |            |              |                                                     |            |              |                                                               |            |              |
| Control                                              | 5634                                                 | 3286       | 85.10 (0.55) | 5285                                         | 3329       | 86.66 (0.55) | 2401                                                | 1414       | 88.92 (0.80) | 4066                                                          | 2465       | 86.57 (0.63) |
| Treated                                              | 1000                                                 | 774        | 14.90 (0.55) | 826                                          | 512        | 13.34 (0.55) | 252                                                 | 146        | 11.08 (0.80) | 680                                                           | 415        | 13.43 (0.63) |
| Duration of treatment (months)                       |                                                      |            |              |                                              |            |              |                                                     |            |              |                                                               |            |              |
| Median (IQR)                                         | 17.08 (3.24-46.02)                                   |            |              | 12.00 (3.14-35.09)                           |            |              | 11.35 (4.52-34.95)                                  |            |              | 16.90 (2.74-35.20)                                            |            |              |
| Min-Max                                              | 1-252                                                |            |              | 1-192                                        |            |              | 1-204                                               |            |              | 1-204                                                         |            |              |
| <6 months                                            | 286                                                  | 197        | 28.85 (1.70) | 245                                          | 175        | 29.55 (1.85) | 75                                                  | 47         | 26.60 (3.18) | 202                                                           | 142        | 30.73 (2.90) |
| 6 months-2 years                                     | 325                                                  | 197        | 33.92 (1.88) | 276                                          | 173        | 34.66 (2.04) | 89                                                  | 51         | 38.07 (3.61) | 222                                                           | 144        | 33.75 (2.25) |
| >2, ≤5 years                                         | 245                                                  | 156        | 24.37 (1.72) | 206                                          | 132        | 25.66 (1.89) | 62                                                  | 46         | 25.11 (3.10) | 169                                                           | 103        | 25.00 (2.19) |
| >5, ≤8 years                                         | 72                                                   | 54         | 7.00 (0.95)  | 52                                           | 51         | 5.32 (0.80)  | 15                                                  | 9          | 6.27 (1.76)  | 43                                                            | 44         | 5.40 (0.90)  |
| >8 years                                             | 72                                                   | 65         | 5.85 (0.79)  | 47                                           | 37         | 4.81 (0.84)  | 11                                                  | 9          | 3.95 (1.25)  | 44                                                            | 38         | 5.12 (0.93)  |
| Age at first treatment (years)                       |                                                      |            |              |                                              |            |              |                                                     |            |              |                                                               |            |              |
| Mean (SE)                                            | 50.83 (0.20)                                         |            |              | 52.09 (0.17)                                 |            |              | 51.13 (0.36)                                        |            |              | 51.12 (0.26)                                                  |            |              |
| Min-Max                                              | 31-70                                                |            |              | 42-70                                        |            |              | 35-69                                               |            |              | 31-69                                                         |            |              |
| <50                                                  | 341                                                  | 265        | 36.88 (1.92) | 193                                          | 128        | 24.48 (2.14) | 80                                                  | 52         | 31.14 (3.56) | 206                                                           | 119        | 33.00 (2.74) |
| ≥50, <55                                             | 419                                                  | 333        | 43.70 (1.94) | 408                                          | 256        | 51.72 (2.47) | 117                                                 | 74         | 48.24 (4.18) | 295                                                           | 185        | 43.54 (2.80) |
| ≥55, <60                                             | 170                                                  | 163        | 13.79 (1.27) | 161                                          | 130        | 16.79 (1.75) | 33                                                  | 24         | 10.76 (2.59) | 132                                                           | 104        | 17.44 (2.02) |
| ≥60                                                  | 70                                                   | 81         | 5.64 (0.76)  | 64                                           | 56         | 7.00 (1.23)  | 22                                                  | 15         | 9.85 (2.78)  | 47                                                            | 47         | 6.01 (1.18)  |
| Time to treatment initiation after menopause (years) |                                                      |            |              |                                              |            |              |                                                     |            |              |                                                               |            |              |
| Median (IQR)                                         | 0.41 (-0.56-2.97)                                    |            |              | 0.16 (-0.65-2.22)                            |            |              | 0.27 (-0.77-2.85)                                   |            |              | 0.41 (-0.54-2.97)                                             |            |              |



| Min-Max          | -5-23 |     |              | -5-22 |     |              | -5-20 |    |              | -5-27 |     |              |
|------------------|-------|-----|--------------|-------|-----|--------------|-------|----|--------------|-------|-----|--------------|
| Before menopause | 99    | 69  | 10.43 (1.16) | 101   | 74  | 13.00 (1.37) | 42    | 26 | 18.58 (2.89) | 61    | 49  | 8.81 (1.24)  |
| <1 year          | 322   | 199 | 33.30 (1.83) | 273   | 172 | 34.39 (2.01) | 68    | 40 | 27.52 (3.33) | 226   | 136 | 35.01 (2.34) |
| 1-2 years        | 236   | 155 | 24.92 (1.70) | 204   | 141 | 26.16 (1.83) | 63    | 41 | 25.68 (3.21) | 152   | 96  | 23.78 (2.07) |
| 3-6 years        | 191   | 131 | 18.62 (1.49) | 157   | 122 | 17.73 (1.50) | 41    | 29 | 15.72 (2.43) | 136   | 94  | 19.49 (1.88) |
| 7-10 years       | 89    | 75  | 7.42 (0.91)  | 52    | 44  | 4.86 (0.81)  | 22    | 15 | 8.05 (1.86)  | 60    | 55  | 7.01 (1.07)  |
| ≥11 years        | 63    | 60  | 5.31 (0.73)  | 39    | 38  | 3.86 (0.68)  | 16    | 17 | 4.45 (1.15)  | 45    | 41  | 5.91 (0.99)  |

Inverse probability of treatment weighting was not applied. *n*, unweighted frequency; *n'*, effective sample size (=n/design effect); %, weighted percentage; SE, standard error; IQR, interquartile range.

a Data on hysterectomies were collected in 2008 and 2009 only.

b Data on oophorectomies were collected in 2010, 2011, and 2012 only.
